# Supplementary material for: Gut Microbiota Differs Between Parkinson’s Disease Patients and Healthy Controls in Northeast China
Source: PubMed Central journal article supplement (PMC6637281; doi:10.3389/fnmol.2019.00171), 2019-07-11
Supplement: Presentation_1.pdf [file Presentation_1.pdf]

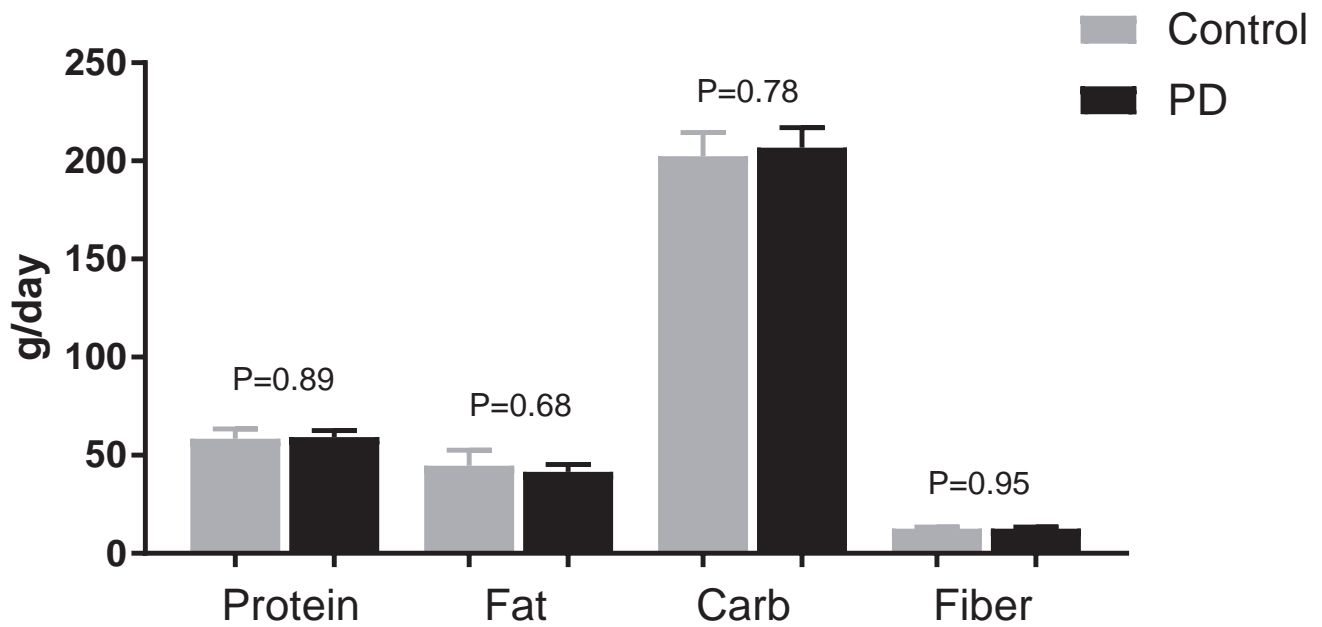

**Supplemental Figure 1. Comparison of dietary intake between PD patients and controls.** Unpaired t-test, n=42 for PD, n=23 for control. Data are presented as mean  $\pm$  s.e.m.

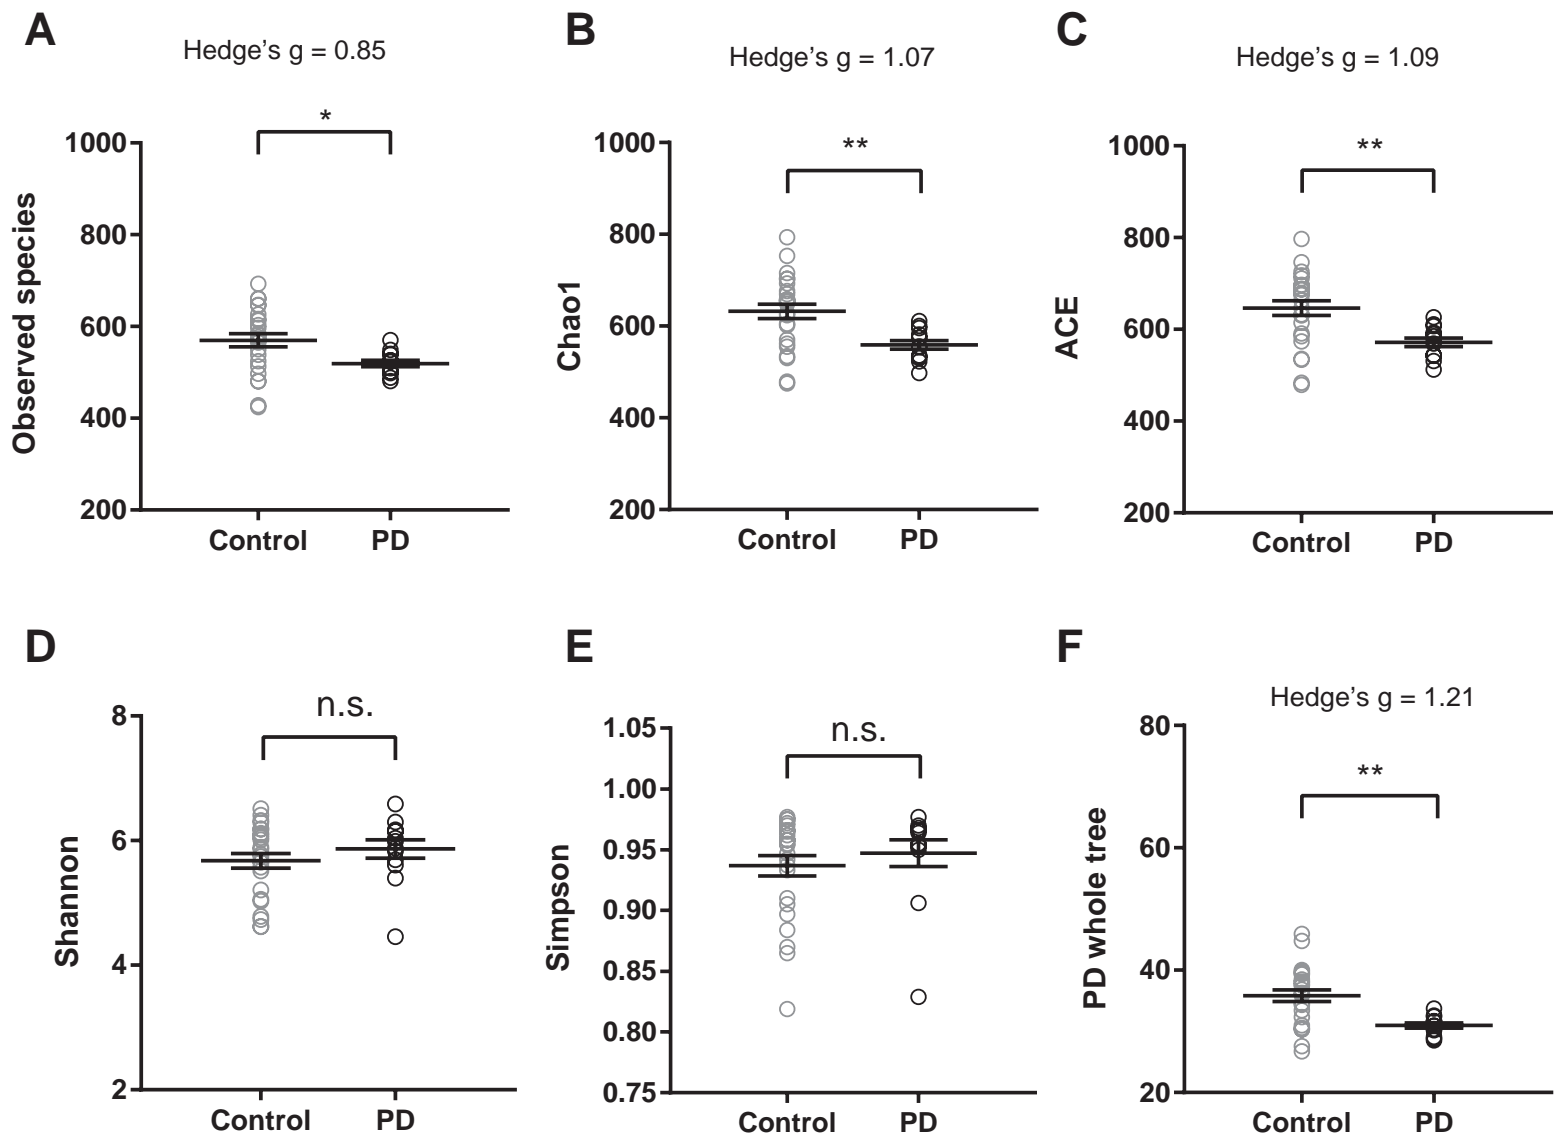

**Supplemental Figure 2. Comparison of microbiota richness and diversity indices between PD patients and controls with constipation Wexner score  $\leq 3$ .** A-C: species richness, D-E:  $\alpha$ -diversity, F: phylogenetic diversity.  $n=13$  for PD,  $n=25$  for control. Data are presented as mean  $\pm$  s.e.m. with individual replicates also shown. \* $p < 0.05$ , \*\* $p < 0.01$ , n.s.: not significant, unpaired t-test.

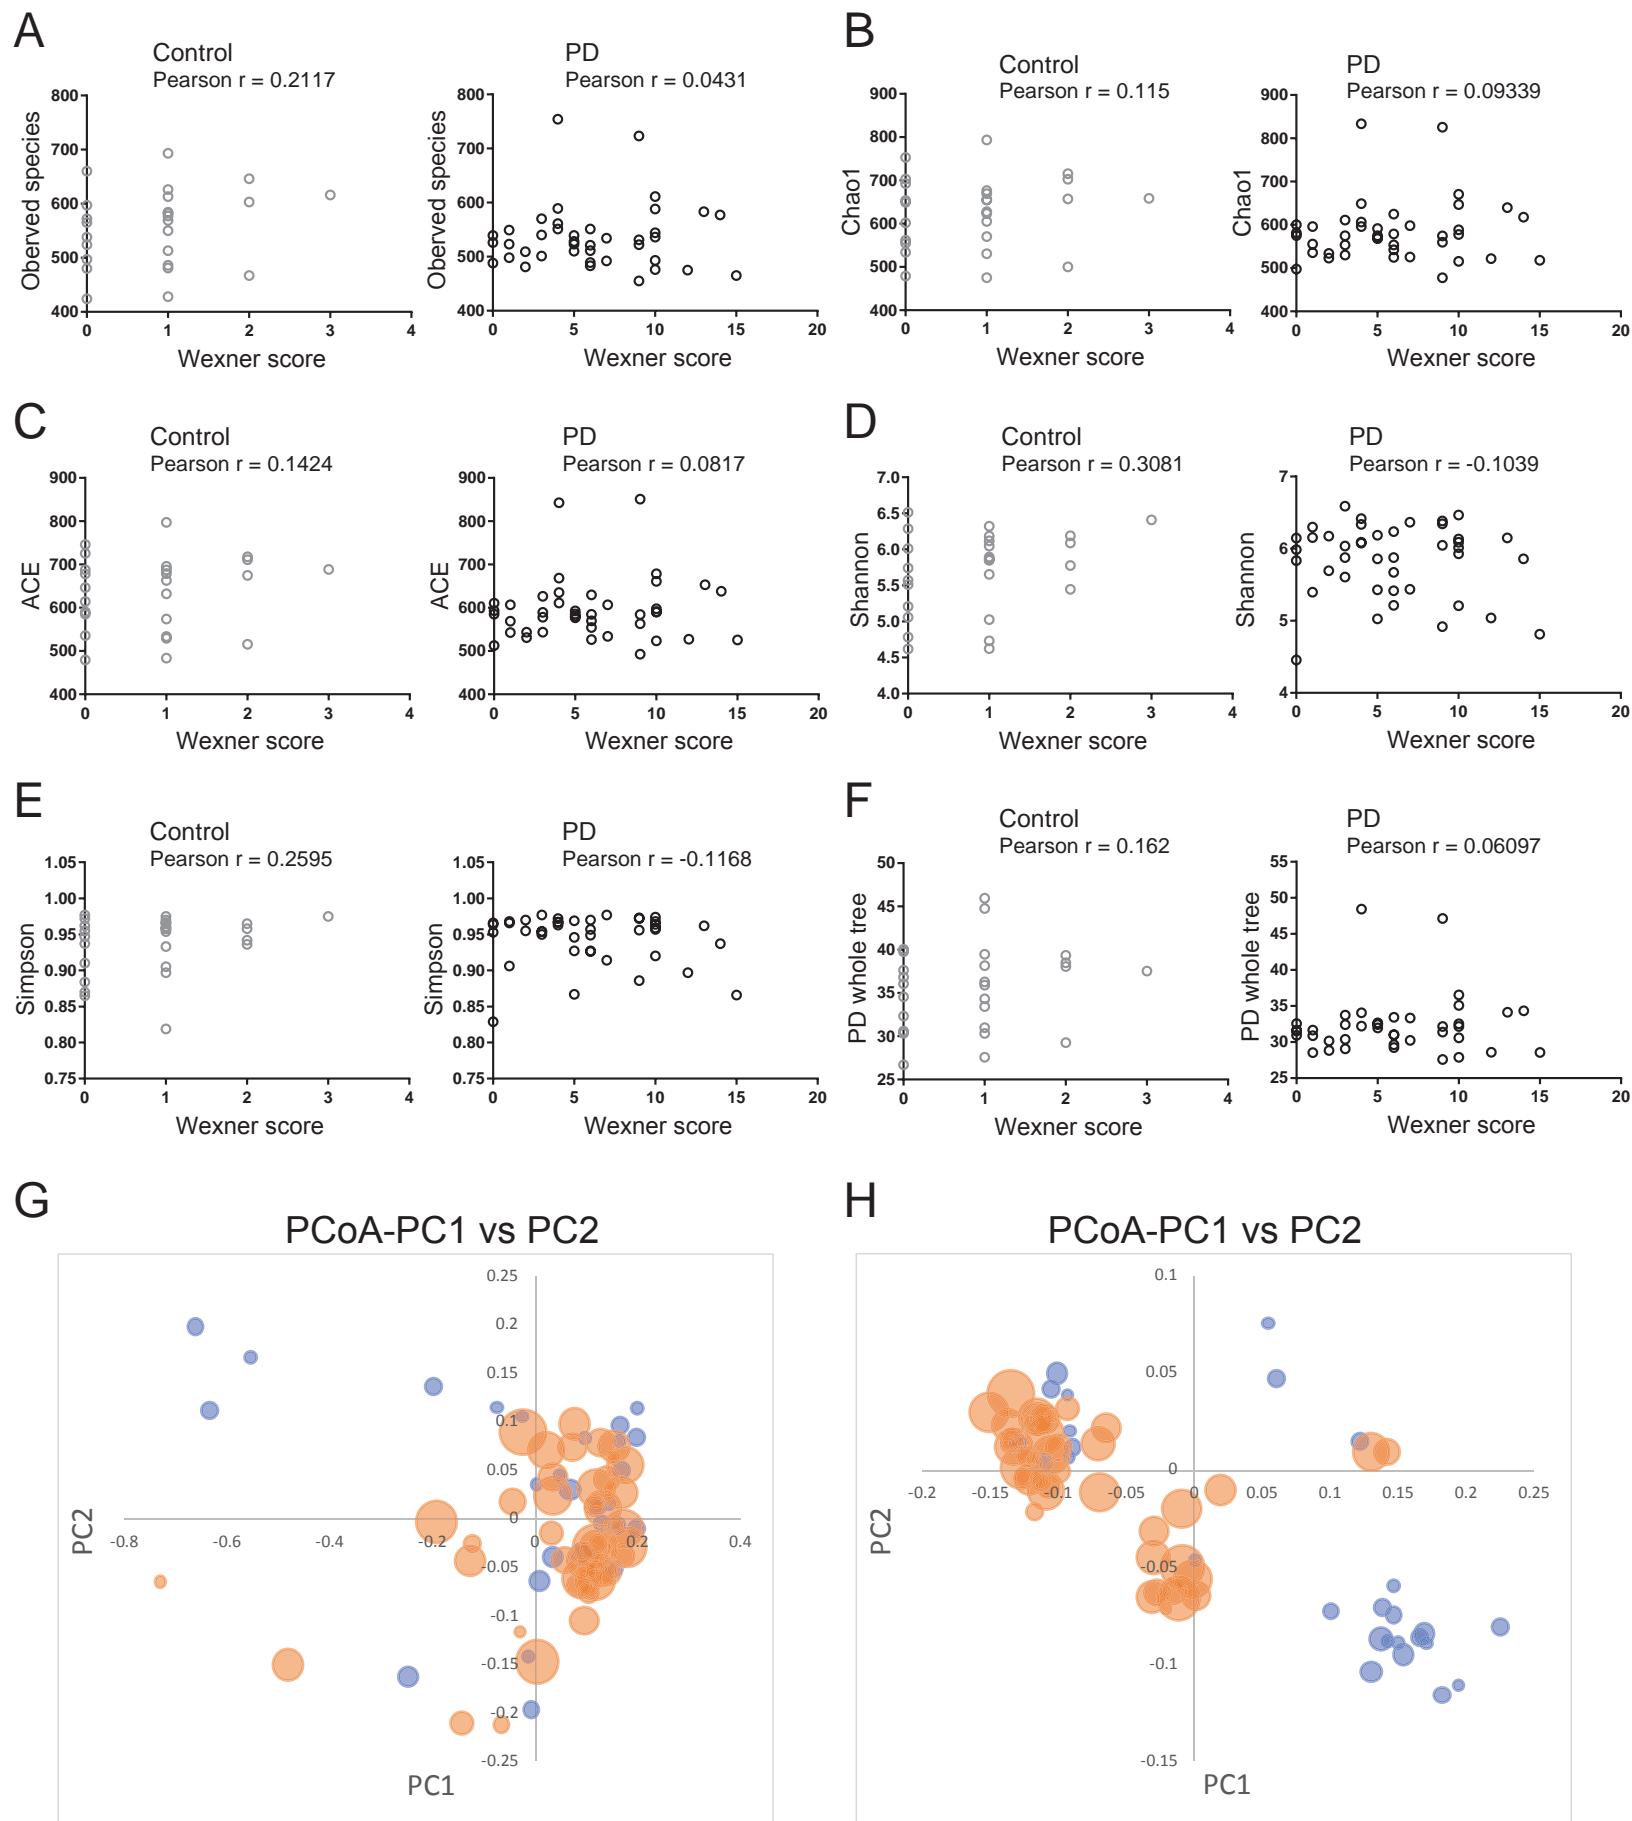

**Supplemental Figure 3. Impact of constipation on gut microbiota richness and diversity indices.**

A-F: Correlation analysis to assess the impact of constipation on species richness,  $\alpha$ -diversity and phylogenetic diversity indices. G,H: Impact of constipation on  $\beta$ -diversity. Data shown are the results of Principal Co-ordinates Analysis (PCoA) plotted with weighted Unifrac (G) and unweighted Unifrac (H) in controls (blue bubbles) and PD patients (orange bubbles). The size of the bubbles indicates the severity of the constipation (Wexner score).

○ Control  
○ PD

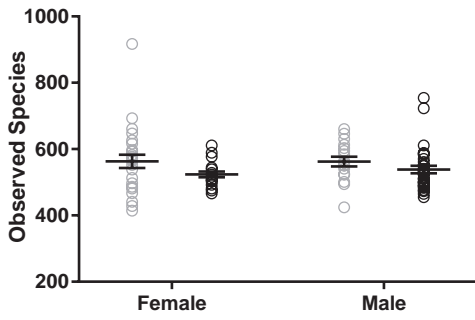

Two-way ANOVA:  
Interaction  $P=0.6267$   
Main effect 1 (Gender)  $P=0.6512$   
Main effect 2 (PD)  $P=0.0436$

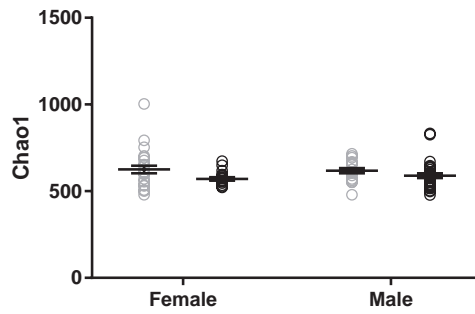

Two-way ANOVA:  
Interaction  $P=0.4595$   
Main effect 1 (Gender)  $P=0.7348$   
Main effect 2 (PD)  $P=0.0181$

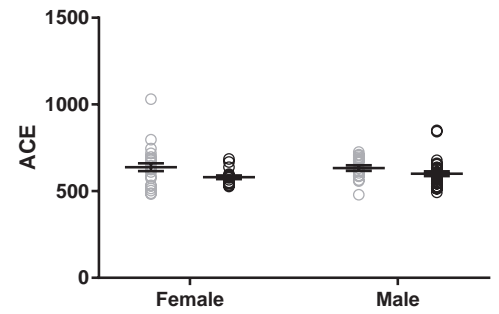

Two-way ANOVA:  
Interaction  $P=0.4748$   
Main effect 1 (Gender)  $P=0.6693$   
Main effect 2 (PD)  $P=0.0131$

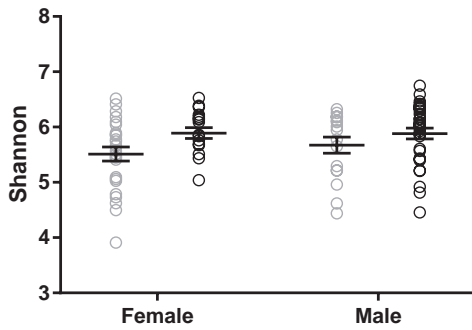

Two-way ANOVA:  
Interaction  $P=0.4805$   
Main effect 1 (Gender)  $P=0.5196$   
Main effect 2 (PD)  $P=0.0162$

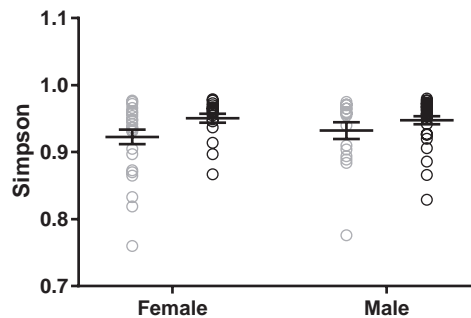

Two-way ANOVA:  
Interaction  $P=0.5063$   
Main effect 1 (Gender)  $P=0.7291$   
Main effect 2 (PD)  $P=0.0215$

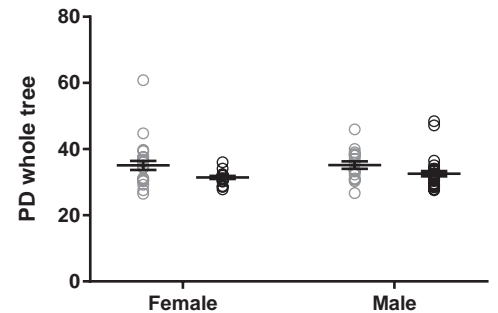

Two-way ANOVA:  
Interaction  $P=0.6097$   
Main effect 1 (Gender)  $P=0.5503$   
Main effect 2 (PD)  $P=0.0042$

**Supplemental Figure 4. Two-way ANOVA analysis to assess the impact of gender and PD on species richness,  $\alpha$ -diversity and phylogenetic diversity indices.**

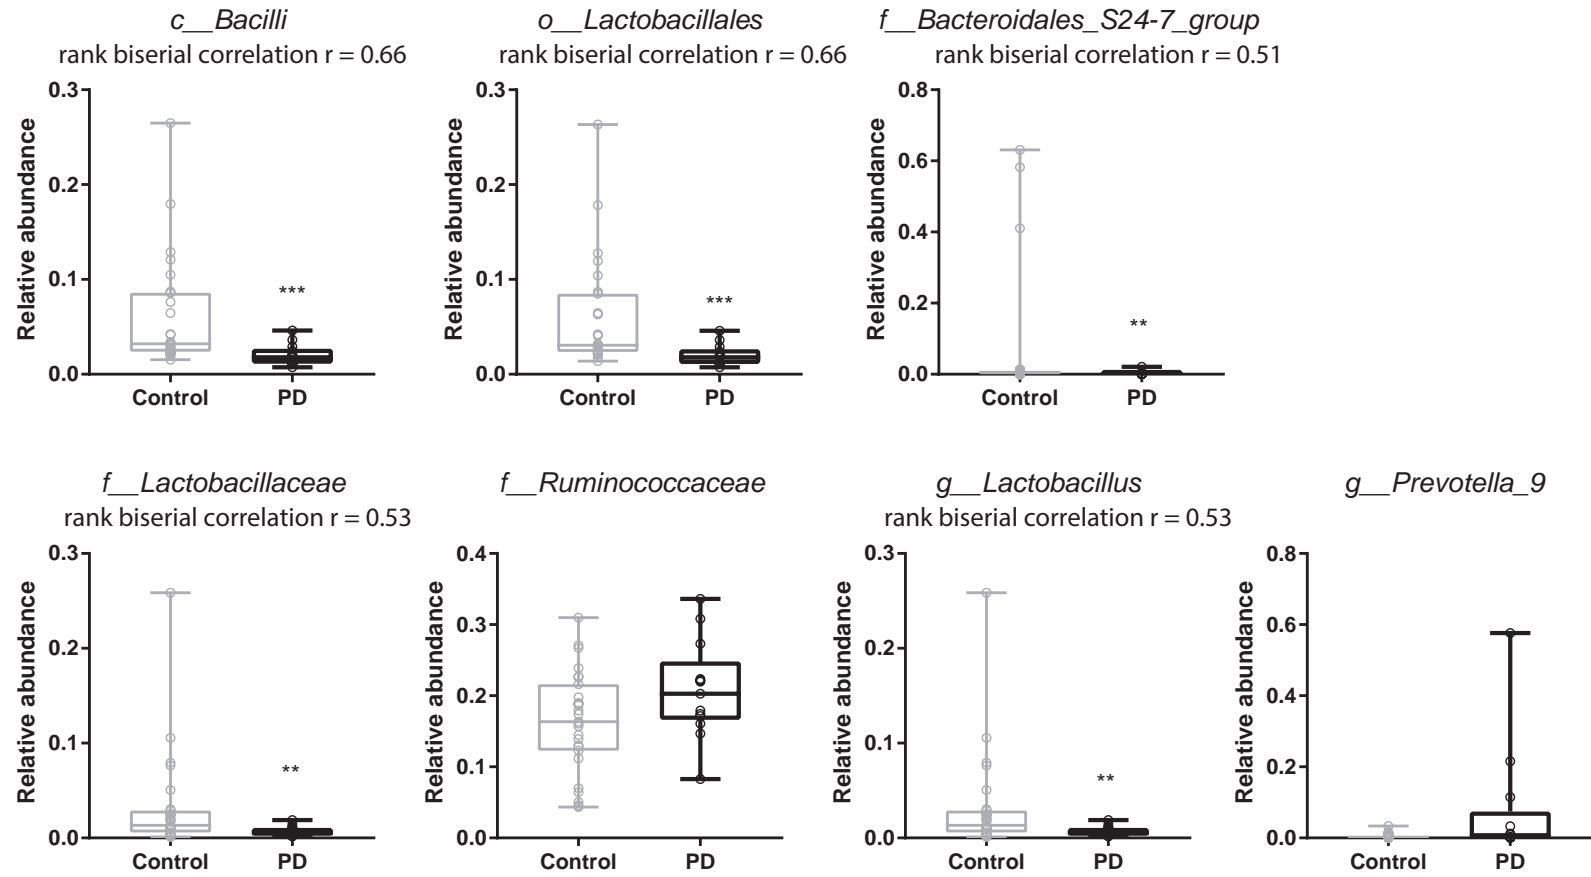

**Supplemental Figure 5. Comparison of microbiota abundances between PD patients and controls with constipation Wexner score  $\leq 3$ .** Wilcoxon rank-sum test,  $n=13$  for PD,  $n=25$  for control. \*\* $p < 0.01$ , \*\*\* $p < 0.001$ , .

### *c\_\_Bacilli*

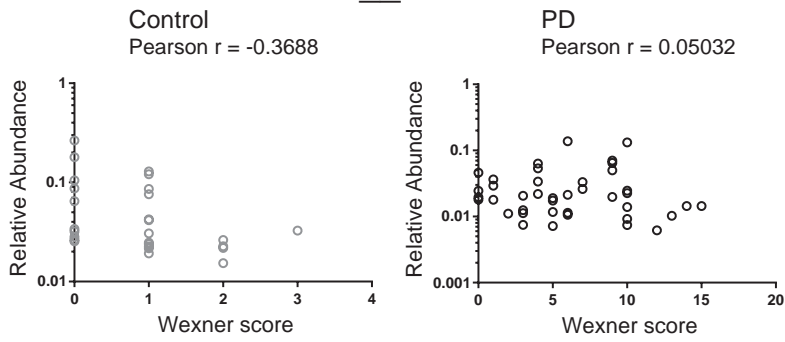

### *o\_\_Lactobacillales*

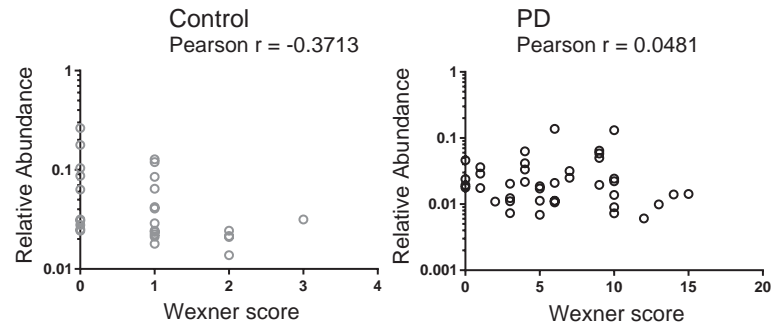

### *f\_\_Bacteroidales\_S24-7\_group*

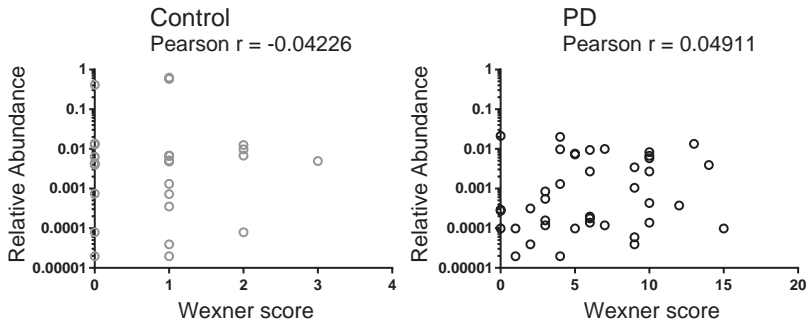

### *f\_\_Lactobacillaceae*

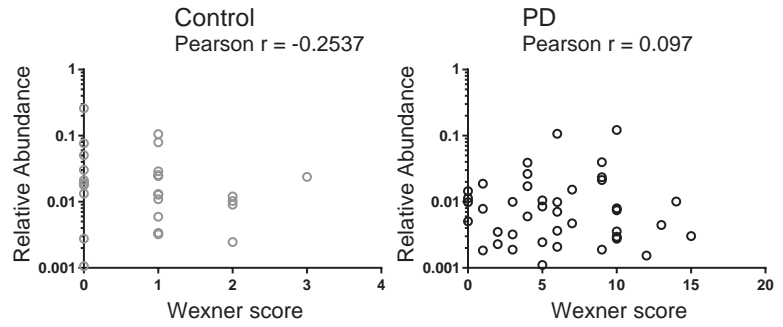

### *f\_\_Ruminococcaceae*

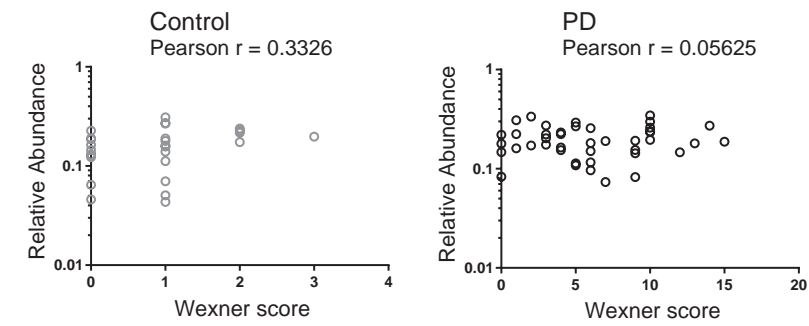

### *g\_\_Lactobacillus*

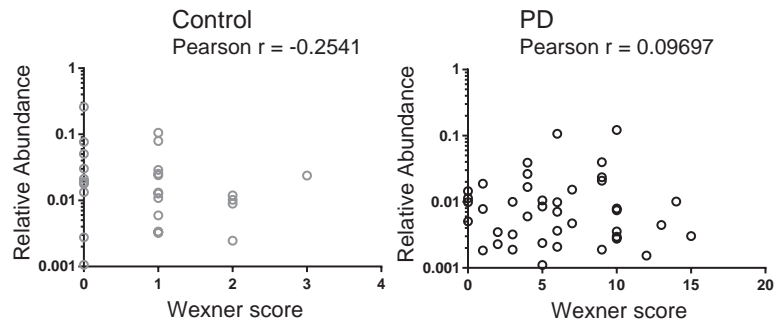

### *g\_\_Prevotella\_9*

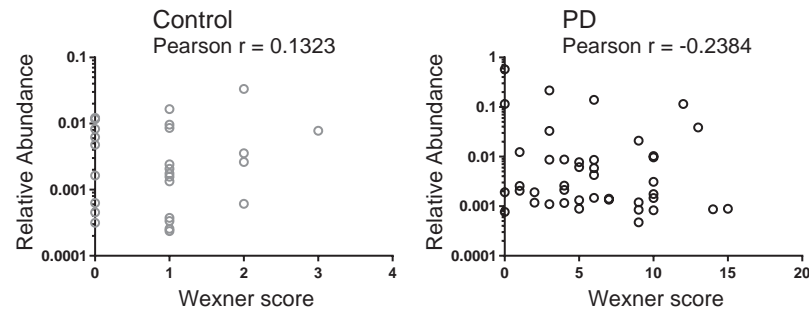

**Supplemental Figure 6. Correlation analysis to assess the impact of constipation on the relative abundance of individual taxa.** The correlations between the abundances and the Wexner constipation scores are weak, suggesting that the severity of constipation does not have a strong effect on the abundances of these taxa.

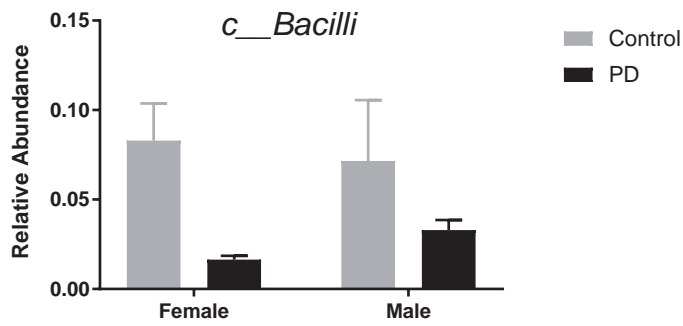

| ANOVA table   | SS (Type III) | DF | MS        | F (DFn, DFd)       | P value         |
|---------------|---------------|----|-----------|--------------------|-----------------|
| Interaction   | 0.004273      | 1  | 0.004273  | F (1, 90) = 0.6149 | P=0.4350        |
| Sex           | 0.0001383     | 1  | 0.0001383 | F (1, 90) = 0.0199 | P=0.8881        |
| PD vs control | 0.06107       | 1  | 0.06107   | F (1, 90) = 8.79   | <b>P=0.0039</b> |
| Residual      | 0.6253        | 90 | 0.006948  |                    |                 |

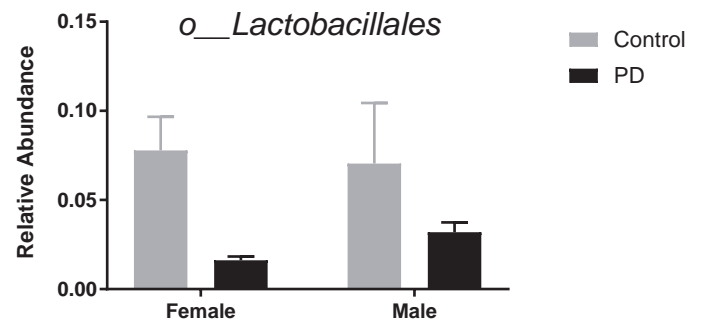

| ANOVA table   | SS (Type III) | DF | MS        | F (DFn, DFd)        | P value         |
|---------------|---------------|----|-----------|---------------------|-----------------|
| Interaction   | 0.002921      | 1  | 0.002921  | F (1, 90) = 0.4577  | P=0.5004        |
| Sex           | 0.0003813     | 1  | 0.0003813 | F (1, 90) = 0.05975 | P=0.8074        |
| PD vs control | 0.05545       | 1  | 0.05545   | F (1, 90) = 8.689   | <b>P=0.0041</b> |
| Residual      | 0.5743        | 90 | 0.006381  |                     |                 |

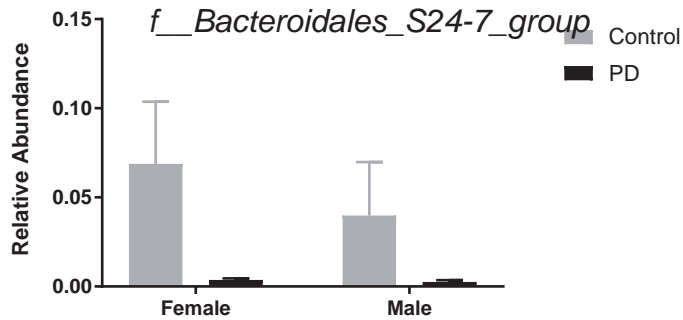

| ANOVA table   | SS (Type III) | DF | MS       | F (DFn, DFd)       | P value         |
|---------------|---------------|----|----------|--------------------|-----------------|
| Interaction   | 0.004315      | 1  | 0.004315 | F (1, 90) = 0.3744 | P=0.5422        |
| Sex           | 0.004997      | 1  | 0.004997 | F (1, 90) = 0.4336 | P=0.5119        |
| PD vs control | 0.05778       | 1  | 0.05778  | F (1, 90) = 5.013  | <b>P=0.0276</b> |
| Residual      | 1.037         | 90 | 0.01152  |                    |                 |

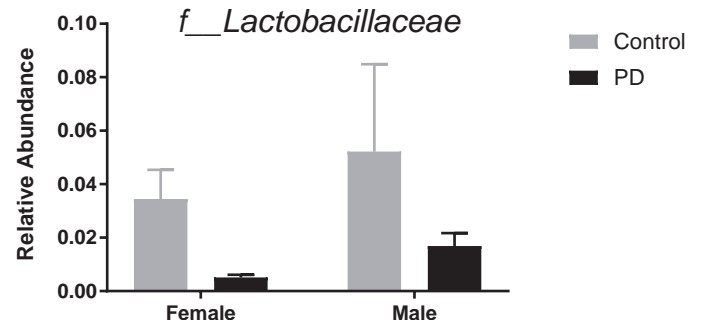

| ANOVA table   | SS (Type III) | DF | MS        | F (DFn, DFd)      | P value         |
|---------------|---------------|----|-----------|-------------------|-----------------|
| Interaction   | 0.0001958     | 1  | 0.0001958 | F (1, 90) = 0.045 | P=0.8325        |
| Sex           | 0.004801      | 1  | 0.004801  | F (1, 90) = 1.103 | P=0.2964        |
| PD vs control | 0.02309       | 1  | 0.02309   | F (1, 90) = 5.306 | <b>P=0.0236</b> |
| Residual      | 0.3917        | 90 | 0.004352  |                   |                 |

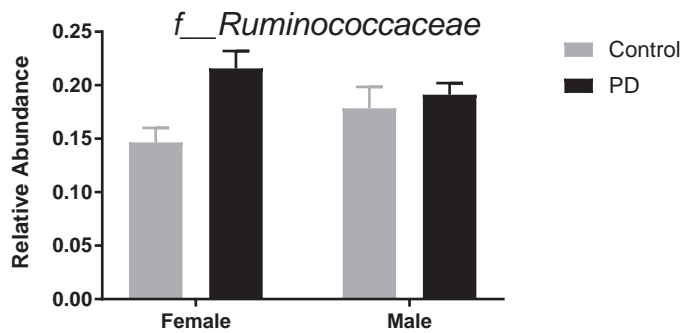

| ANOVA table   | SS (Type III) | DF | MS        | F (DFn, DFd)       | P value         |
|---------------|---------------|----|-----------|--------------------|-----------------|
| Interaction   | 0.01754       | 1  | 0.01754   | F (1, 90) = 3.639  | P=0.0596        |
| Sex           | 0.0003045     | 1  | 0.0003045 | F (1, 90) = 0.0632 | P=0.8021        |
| PD vs control | 0.03713       | 1  | 0.03713   | F (1, 90) = 7.707  | <b>P=0.0067</b> |
| Residual      | 0.4336        | 90 | 0.004818  |                    |                 |

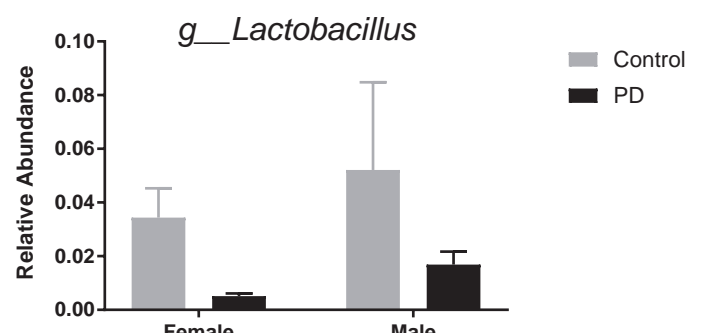

| ANOVA table   | SS (Type III) | DF | MS        | F (DFn, DFd)        | P value         |
|---------------|---------------|----|-----------|---------------------|-----------------|
| Interaction   | 0.0002024     | 1  | 0.0002024 | F (1, 90) = 0.04656 | P=0.8297        |
| Sex           | 0.004815      | 1  | 0.004815  | F (1, 90) = 1.108   | P=0.2954        |
| PD vs control | 0.02301       | 1  | 0.02301   | F (1, 90) = 5.293   | <b>P=0.0237</b> |
| Residual      | 0.3913        | 90 | 0.004348  |                     |                 |

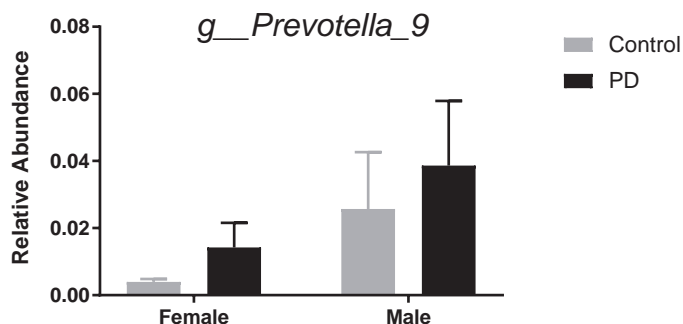

| ANOVA table   | SS (Type III) | DF | MS        | F (DFn, DFd)         | P value  |
|---------------|---------------|----|-----------|----------------------|----------|
| Interaction   | 0.00003773    | 1  | 3.773E-05 | F (1, 90) = 0.007314 | P=0.9320 |
| Sex           | 0.01176       | 1  | 0.01176   | F (1, 90) = 2.279    | P=0.1347 |
| PD vs control | 0.002972      | 1  | 0.002972  | F (1, 90) = 0.576    | P=0.4498 |
| Residual      | 0.4643        | 90 | 0.005159  |                      |          |

**Supplemental Figure 7. Two-way ANOVA analysis to assess the impact of gender and PD on gut microbiota taxa identified by LDA scores >4 in LEfSe analysis.**
